# Supplementary material
Source: PubMed Central journal article supplement (PMC5775926)

Figure E1. CONSORT diagram outlining subject randomization & participation in a Phase IIa crossover study of volunteers with mild asthma.

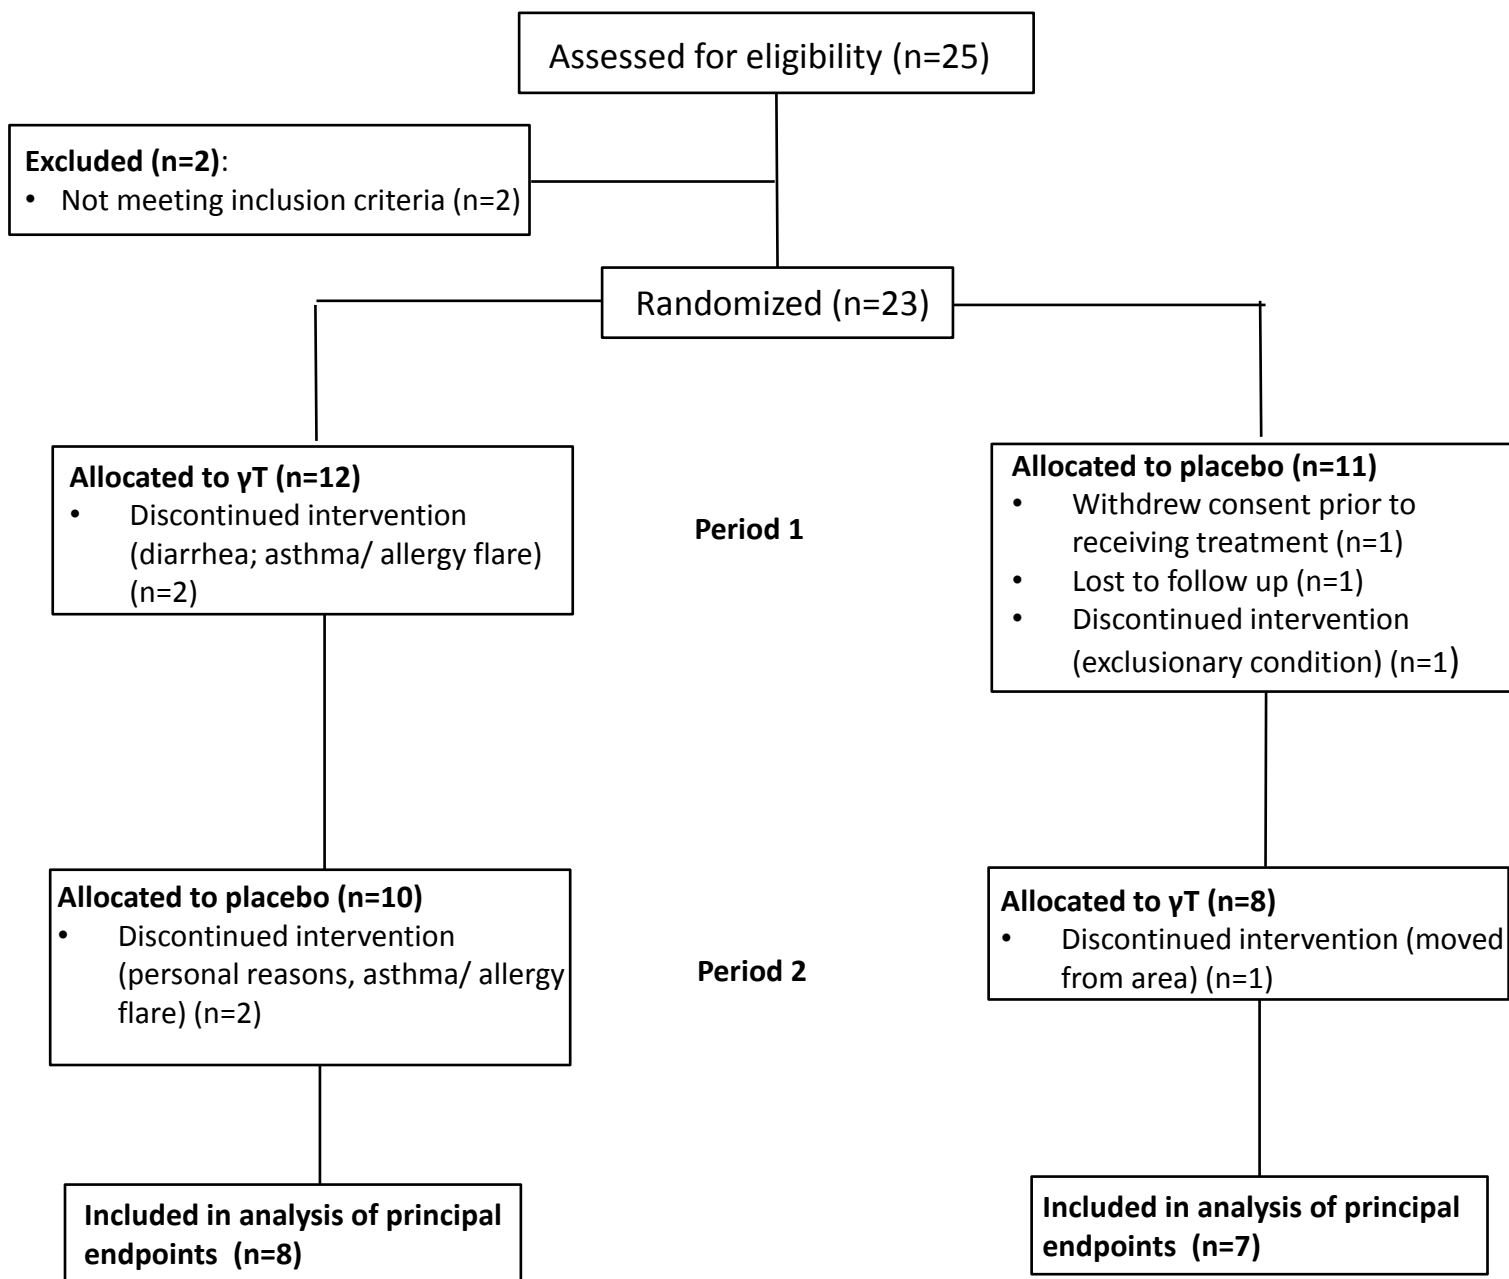

Supplement: NIHMS894475-supplement-supplement_1.pdf [file NIHMS894475-supplement-supplement_1.pdf]
